# Supplementary material for: Single Domain Antibodies as New Biomarker Detectors
Source: MDPI journal article supplement (doi:10.3390/diagnostics7040052), 2017-10-17
Supplement: s1 [file s1]

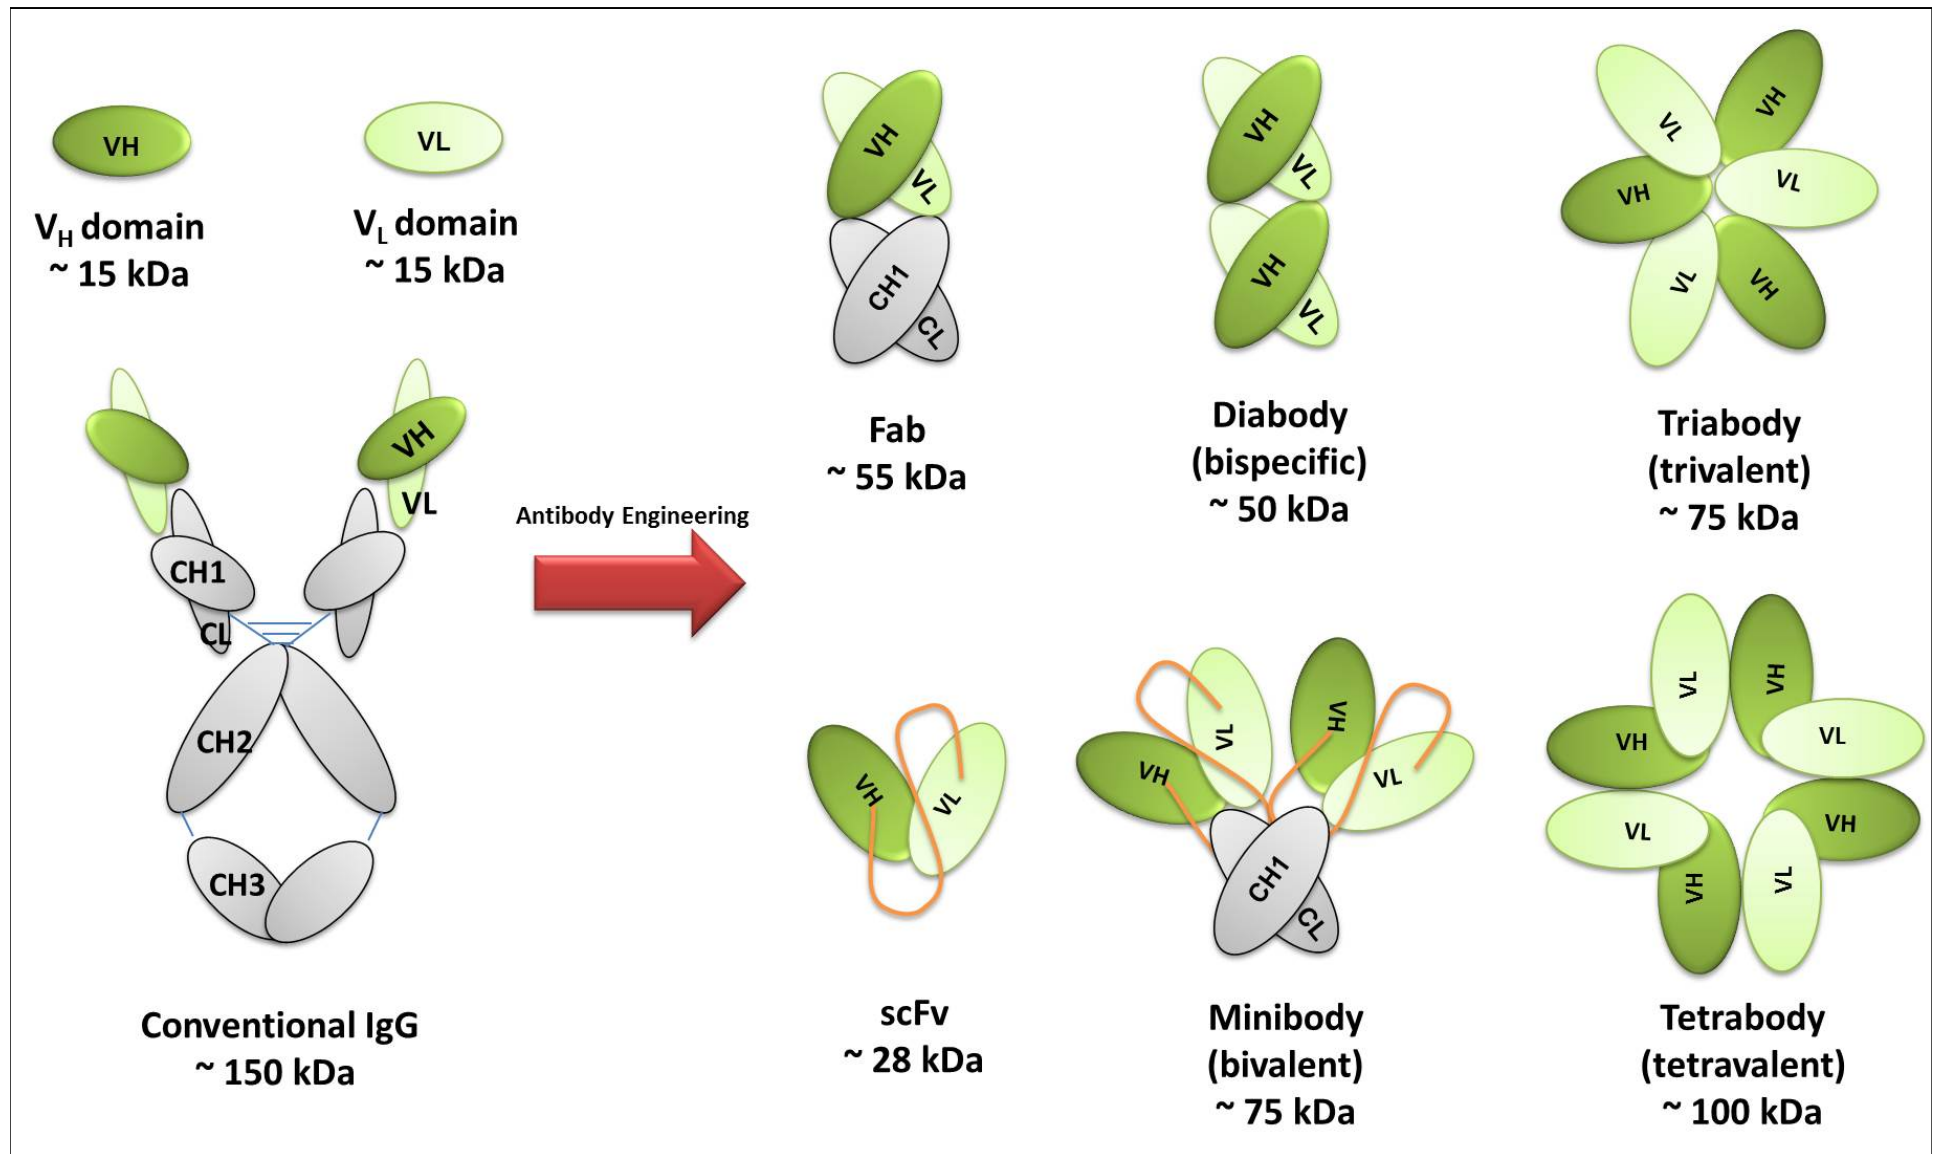

**Figure S1.** Schematic representation of conventional antibody IgG together with its engineered recombinant antibody fragments, including Fab fragment, scFv monomer, dimer (diabody), trimer (triabody) and tetramer (tetrabod) with linkers represented by an orange line. Minibodies are shown as two scFv modules joined by two C domains.
